# Supplementary material for: Tunable band gaps in silicene–MoS2heterobilayers
Source: Royal Society of Chemistry journal article supplement (doi:10.1039/c4cp00089g), 2014-01-01
Supplement: c4cp00089g1.pdf [file c4cp00089g1.pdf]

Supplementary Information

Tunable band gaps in silicene/MoS<sub>2</sub> heterobilayers

N. Gao, J. C. Li,\* Q. Jiang\*

*Key Laboratory of Automobile Materials (Jilin University), Ministry of Education,  
and School of Materials Science and Engineering, Jilin University, Changchun,  
130022, China*

---

\* Author to whom any correspondence should be addressed: Fax: +86 431 85095876; E-mail: [ljc@jlu.edu.cn](mailto:ljc@jlu.edu.cn), [jiangq@jlu.edu.cn](mailto:jiangq@jlu.edu.cn).

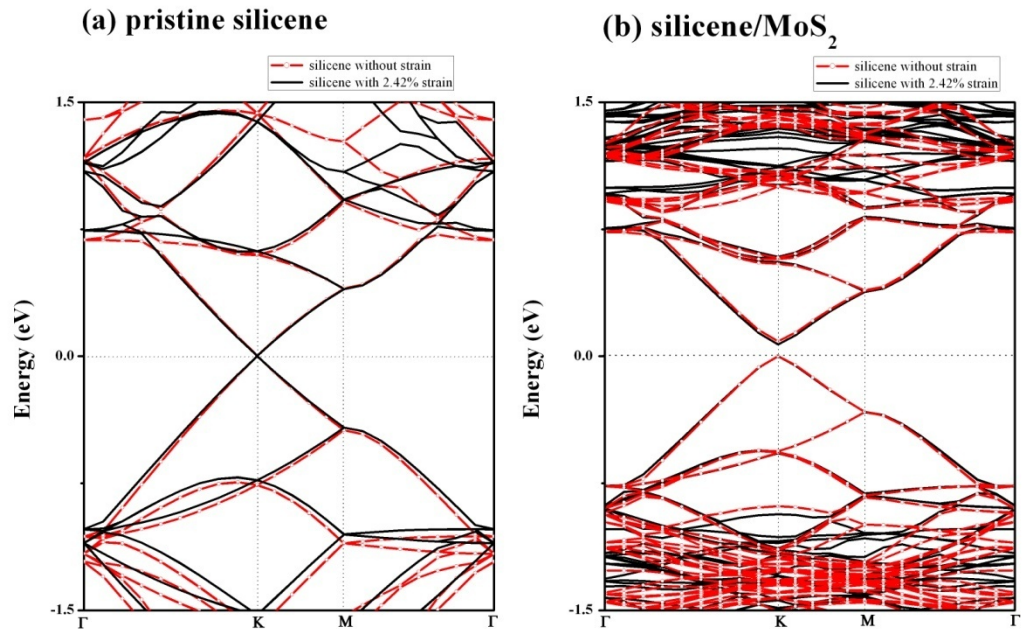

Fig. S1 The band structures of (a) pristine silicene and (b) stable silicene/MoS<sub>2</sub> heterobilayer. The both adopt two matching procedures: silicene without strain and silicene with 2.42% strain.

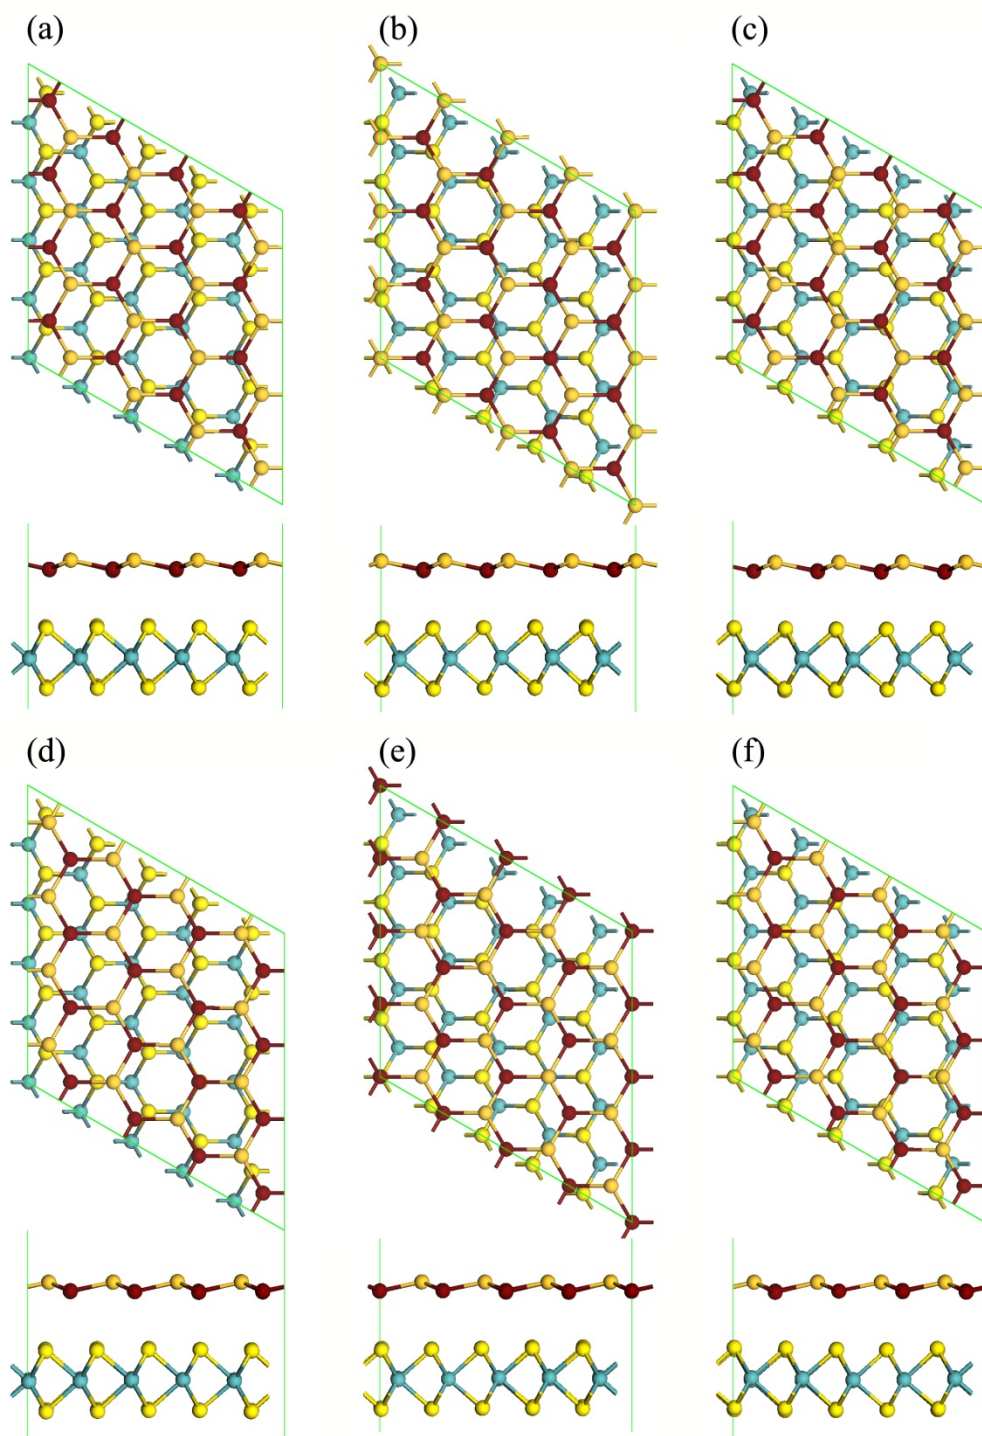

Fig. S2 Top and side views of silicene/MoS<sub>2</sub> configurations. The yellow, blue, khaki and brown balls denote S, Mo, A and B sublattices of Si atoms in silicene, respectively. The supercell is represented by the green lines.

Table S1: Structural parameters and electronic properties of silicene/MoS<sub>2</sub> heterobilayers shown in Fig. S2.  $E_b$  (meV/Si),  $d$  (Å) and  $E_g$  (meV) stand for binding energy, interlayer distance and band gap values, respectively.

| Structure | $E_b$ (meV/Si) | $d$ (Å) | $E_g$ (meV) |
|-----------|----------------|---------|-------------|
| a         | 120.32         | 2.93    | 70          |
| b         | 119.32         | 2.96    | 52          |
| c         | 119.53         | 2.95    | 51          |
| d         | 119.88         | 2.95    | 50          |
| e         | 120.04         | 2.93    | 71          |
| f         | 120.04         | 2.92    | 72          |
